# Supplementary material
Source: Springer Nature journal article supplement (https://www.springermedizin.de/resource/supplementary/13002_2010_204_MOESM4_ESM.pdf/9627384)

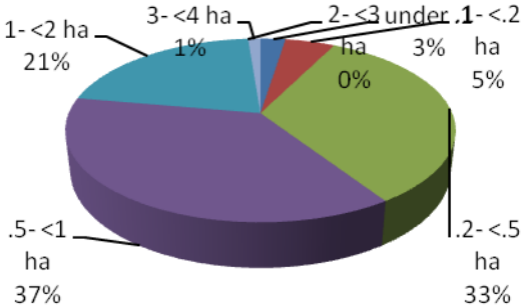

Supplement: MOESM4 [file 9627384]
